# Supplementary material
Source: PubMed Central journal article supplement (PMC2945419)

**Supplemental Figure 1:** Schematic layout of 14-Unit T Maze (Stone Maze). Mice (\*) are placed at the start box (S), and most negotiate a series of turns in order to reach the dark and dry goal box (G). The number of errors made during the task is the primary endpoint.

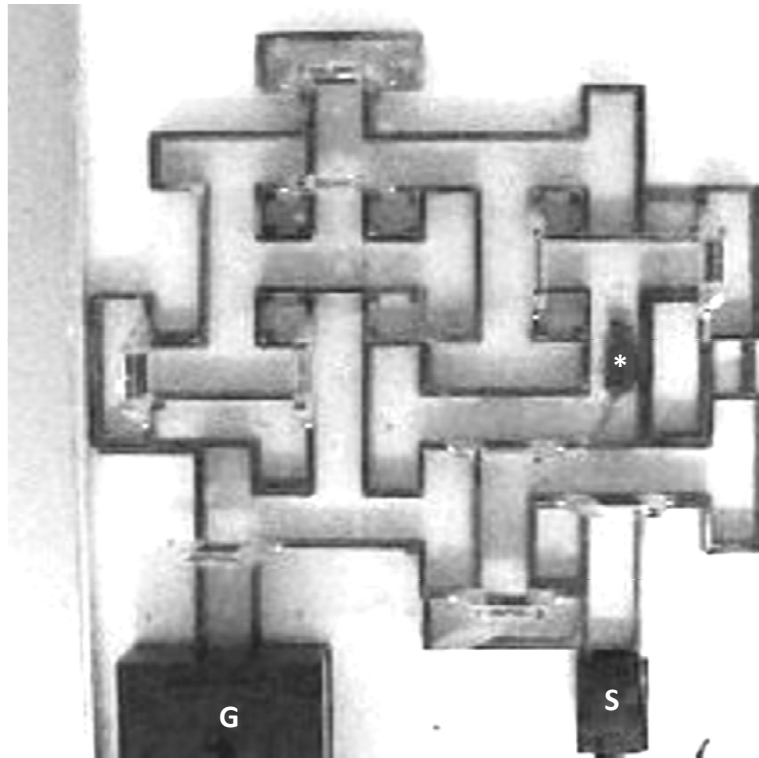

Supplement: NIHMS219389-supplement-Supp_Figure_01.pdf [file NIHMS219389-supplement-Supp_Figure_01.pdf]
